# Supplementary material for: Comparative analysis of carbon footprint between conventional smallholder operation and innovative largescale farming of urban agriculture in Beijing, China
Source: PeerJ. 2021 Jun 29;9:e11632. doi: 10.7717/peerj.11632 (PMC8253110; doi:10.7717/peerj.11632)
Supplement: Supplemental Information 1 — The number in the table was the average value of total consumption divided by the total cultivation area (or output) of each type. [file peerj-09-11632-s001.xlsx]

## Sheet: Sheet1
	Inputs(per ha)	VC	VN	FC	FN
1. Field preparation
	Diesel	61.8727	4.09343	43.4828	8.01603
	Gasoline	4.62234	68.2089	2.65584	46.9579
2.Fertilizer application
Organic fertilizer:	Manure (fresh)	46.3141	44.3173	72.352	47.0441
	Manure (dry)	0	1186.1	390.564	179.839
Chemical fertilizer:	N	176.767	32.0619	-	-
	P	187.631	32.0619	-	-
	K	150.861	32.0619	-	-
3. Pesticide application
	Insecticide	12.9213	2.38028	0.956374	0.951743
	Fungicide	1.33708	0.431583	1.35751	0.706713
4. Irrigation
	Electricity	2788.63	2738.75	2473.82	2457.25
5.Warmth retention
	Greenhouse cover	1184.73	1052.24	1200.59	1082.16
	Mulching film	256.427	183.95	119.122	117.084
	Electricity	1085.11	1040.63	1187.31	1283.06
