# Supplementary material for: Comparative analysis of carbon footprint between conventional smallholder operation and innovative largescale farming of urban agriculture in Beijing, China
Source: PeerJ. 2021 Jun 29;9:e11632. doi: 10.7717/peerj.11632 (PMC8253110; doi:10.7717/peerj.11632)
Supplement: Supplemental Information 2 [file peerj-09-11632-s002.xlsx]

## Sheet: VC
			PGA01N	DXB01N	SYA04N	FSA00N	SYC02N	SYC04N	MYA02N	SYA03N	MYC02N	FSB01N	SYB04N
Area(ha)			0.0675	0.5333	0.14	0.2227	0.1867	0.12	0.144	0.2	0.039	0.1333	0.6
Total yield (t)			10	92	12	23	23.4	12.685	18.36	22	4.0716	12.5	76.5
Yield per unit(t/ha)			148.148	172.511	85.7143	103.278	125.335	105.708	127.5	110	104.4	93.7734	127.5
Nnumber of crop type			1	2	2	3	1	2	3	3	3	1	2
	Inputs	Unit (per ha)
1. Field preparation
	Diesel	kg	3.12684	35	9.30931		12.4124		9.5	10.5	0	8.4	40
	Gasoline	kg				17.5		12.963
2.Fertilizer application
Organic fertilizer:	Manure (fresh)	t	3	35	8	10	0	5	5	13.3333	0	6.04187	25.1463
	Manure (dry)	kg
Chemical fertilizer:	N	kg	7.5	146.8	0	30	72	0	21.6	30	9.75	0	101.25
	P	kg	7.5	59.9962	0	30	133.9	35.65	21.6	30	9.75	40.5	101.25
	K	kg	7.5	59.9962	0	30	72	8.5	21.6	30	9.75	0	101.25
3. Pesticide application
	Insecticide	kg	0.4	4.7997	1.2	1.6	2.0003	1.7015	2.0132	2.9816	0.456	1.9006	8.545
	Fungicide	kg	1			2.4	3
4. Irrigation
	Electricity	kWh	153	1666.56	428.571	600	685.722	416.667	355.556	300	97.5	278.11	1673.18
5.Warmth retention
	Greenhouse cover	kg	75	707.956	180	240	260.046	125	170.602	150	50	157.925	710.84
	Mulching film	kg	8	159.99	32	64	48.0086	20	36.9255	45	10	34.1818	153.856
	Electricity	kwh	66	599.962	150	240	230.45	150	150	180	48.75	119.97	654.678
					147.876	72.2261
			1.1187	1.2568	87.711	63.9434	28.7405	21.6582

## Sheet: VN
			HDA001	HRA001	TZA02	FSA001	MYA001	PGA001
Area(ha)			3.9086	4.32	1.734	4.1895	7.41	1.89
Total yield (t)			282.247	293.59	187.249	353	479.827	192
Yield per unit(t/ha)			72.2118	67.9606	107.987	84.2583	64.754	101.587
Nnumber of crop type			12	36	25	23	9	8
	Inputs	Unit (per ha)
1. Field preparation
	Diesel	kg						96
	Gasoline	kg	263.837	300	186	306.935	542.878	0
2.Fertilizer application
Organic fertilizer:	Manure (fresh)	t	117.623	130	30	252	400	109.714
	Manure (dry)	kg	10178.9	3012.82	4500	0	10125	0
Chemical fertilizer:	N	kg	0	451.923	300	0	0	0
	P	kg		451.923	300	0	0	0
	K	kg		451.923	300	0	0	0
3. Pesticide application
	Insecticide	kg	7.05738	7.8	3.1	11.34	21	5.76
	Fungicide	kg	4.07156	4.5	1.55	0	0	0
4. Irrigation
	Electricity	kWh	9279.91	10384.6	5285	14000	20000	5280
5.Warmth retention
	Greenhouse cover	kg	4663.16	3000	2064.29	4410	8500	2040
	Mulching film	kg	904.792	1000	361.25	1008	800	240
	Electricity	kwh	4612	4673.08	2400	3780	7500	1440

## Sheet: FC
			SYC01N	SYC03N	CPC01N	SYB01N	HRA002N	CPA001N	CPA002N
Area(ha)			0.1092	0.296	0.12	0.2	0.04	0.2	0.315
Total yield (t)			4.5	10	3.46667	5.25	0.7	7.5	9
Yield per unit(t/ha)			41.2088	33.7838	28.8889	26.25	17.5	37.5	28.5714
Nnumber of crop type			1	1	1	1	1	1	2
	Inputs	Unit (per ha)
1. Field preparation
	Diesel	kg	9	26.6667	0	20	0	0	0
	Gasoline	kg	0	0	0	0	3.4	0	0
2.Fertilizer application
Organic fertilizer:	Manure (fresh)	t	9	24	10	10	3	15.625	21
	Manure (dry)	kg	0	500	0	0	0	0	0
Chemical fertilizer:	N	kg
	P	kg
	K	kg
3. Pesticide application
	Insecticide	kg	0	0	0.1236	0.206	0.058	0.38	0.45675
	Fungicide	kg	0.18018	0.666	0.078	0.3	0.0412	0	0.4725
4. Irrigation
	Electricity	kWh	370	833.333	320	300	50	500	793.651
5.Warmth retention
	Greenhouse cover	kg	150	302	130	250	50	250	405
	Mulching film	kg	12	30	15	25	5	25	40.5
	Electricity	kwh	150	400	180	180	50	200	360

## Sheet: FN
			CPC001	TZB01	HD02	TZ03	CPA02
Area(ha)			1.04	2	8.16	9.8667	2.6667
Total yield (t)			28.1112	75	417.273	104.833	52.069
Yield per unit(t/ha)			27.03	37.5	51.1364	10.625	19.5256
Nnumber of crop type			2	1	3	1	4
	Inputs	Unit (per ha)
1. Field preparation
	Diesel	kg	0	118.667	0	0	0
	Gasoline	kg	68.3216	0	448.8	519.986	148.8
2.Fertilizer application
Organic fertilizer:	Manure (fresh)	t	50	90	412.409	444	120
	Manure (dry)	kg	0	0	94.4	600	3590.62
Chemical fertilizer:	N	kg
	P	kg
	K	kg
3. Pesticide application
	Insecticide	kg	1.0712	1.62	0	14.3067	5.3333
	Fungicide	kg	0.728	3	5.304	8.0827	0
4. Irrigation
	Electricity	kWh	2000	5000	20000	25671.1	5647.06
5.Warmth retention
	Greenhouse cover	kg	1250	2100	8351.83	11800	2400
	Mulching film	kg	130	240	1002.45	888	300
	Electricity	kwh	1040	3000	11127.3	12884.6	2400
